# Supplementary material
Source: PubMed Central journal article supplement (PMC11028083)
Supplement: 262_2019_2371_MOESM1_ESM.pdf [file 262_2019_2371_MOESM1_ESM.pdf]

**Supplementary Table 1. Antibody sources and staining conditions.**

| Markers | Antibody source         | Cellular localization | Species           | Antigen Retrieval         | Dilution |
|---------|-------------------------|-----------------------|-------------------|---------------------------|----------|
| CD3     | DAKO                    | Membranous            | Rabbit Monoclonal | Citrate buffer (pH 6.0)   | 1:200    |
| CD4     | DAKO                    | Membranous            | Rabbit Monoclonal | Tris/EDTA buffer (pH 9.0) | 1:400    |
| CD8     | Abcam                   | Membranous            | Rabbit Monoclonal | Tris/EDTA buffer (pH 9.0) | 1:500    |
| CD14    | Sigma                   | Cytoplasmic           | Rabbit polyclonal | Citrate buffer (pH 6.0)   | 1:500    |
| CD20    | Abcam                   | Membranous            | Rabbit polyclonal | Tris/EDTA buffer (pH 9.0) | 1:200    |
| CD27    | Abcam                   | Membranous            | Rabbit Monoclonal | Tris/EDTA buffer (pH 9.0) | 1:500    |
| CD45RA  | Abcam                   | Membranous            | Mouse Monoclonal  | Citrate buffer (pH 6.0)   | 1:200    |
| CD45RO  | DAKO                    | Membranous            | Mouse Monoclonal  | Citrate buffer (pH 6.0)   | 1:200    |
| CD57    | DAKO                    | Cytoplasmic           | Mouse Monoclonal  | Citrate buffer (pH 6.0)   | 1:200    |
| CD66b   | BD                      | Cytoplasmic           | Mouse Monoclonal  | Citrate buffer (pH 6.0)   | 1:200    |
| CD68    | DAKO                    | Cytoplasmic           | Mouse Monoclonal  | Citrate buffer (pH 6.0)   | 1:200    |
| CD103   | Abcam                   | Cytoplasmic           | Rabbit Monoclonal | Tris/EDTA buffer (pH 9.0) | 1:1000   |
| CXCR5   | CST                     | Membranous            | Rabbit Monoclonal | Citrate buffer (pH 6.0)   | 1:200    |
| FOXP3   | ThermoFisher Scientific | Nuclear               | Rabbit Monoclonal | Citrate buffer (pH 6.0)   | 1:20     |
| PD-L1   | CST                     | Membranous            | Rabbit Monoclonal | Tris/EDTA buffer (pH 9.0) | 1:200    |
| PD1     | CST                     | Membranous            | Rabbit Monoclonal | Citrate buffer (pH 6.0)   | 1:200    |

**Supplementary Table 2. Cox proportional hazards regression model showing the association of variables with overall survival.**

| Variables                         | Univariate analysis |              |                | Multivariate analysis |              |                |
|-----------------------------------|---------------------|--------------|----------------|-----------------------|--------------|----------------|
|                                   | HR                  | 95%CI        | <i>P</i> value | HR                    | 95%CI        | <i>P</i> value |
| CA19-9 ( $\geq 37 / < 37$ , U/mL) | 1.001               | 1.001-1.002  | <0.001         | 1.001                 | 1.001-1.002  | <0.001         |
| ALT ( $\geq 35 / < 35$ , U/L)     | 1.006               | 1.001-1.010  | 0.02           | 0.998                 | 0.991-1.005  | 0.56           |
| GGT ( $\geq 40 / < 40$ , U/L)     | 1.004               | 1.002-1.006  | <0.001         | 1.004                 | 1.001-1.006  | 0.001          |
| Tumor numbers                     | 1.070               | 1.009-1.136  | 0.03           | 1.087                 | 1.014-1.164  | 0.02           |
| Tumor diameter, cm                | 1.069               | 1.012-1.130  | 0.02           | 1.018                 | 0.955-1.086  | 0.58           |
| Lymphoid metastasis (yes/no)      | 2.430               | 1.061-5.566  | 0.04           | 3.074                 | 1.275-7.411  | 0.01           |
| HRI score (low/high)              | 5.415               | 2.532-11.580 | <0.001         | 6.169                 | 2.651-14.355 | <0.001         |

CA19-9, carbohydrate 19-9; ALT, alanine aminotransferase; GGT,  $\gamma$ -glutamyl transpeptidase; HRI, histopathologic-related immunoscore.
